# Supplementary material for: (BA)10AgBi2Br19: a one-dimensional halide double perovskite with a unique Br trimer
Source: Royal Society of Chemistry journal article supplement (doi:10.1039/d2cc05128a), 2022-01-01
Supplement: d2cc05128a1.pdf [file d2cc05128a1.pdf]

Supporting Information for:

# **(BA)<sub>4</sub>AgBi<sub>2</sub>Br<sub>19</sub>: a one-dimensional halide double perovskite with unique Br trimer**

Zhongnan Guo,<sup>\*, a</sup> Hang Ruan,<sup>a</sup> Jiawei Lin,<sup>a</sup> Fan Sun,<sup>a</sup> Kunjie Liu,<sup>b</sup> Xin Chen,<sup>c</sup> Jing Zhao,<sup>b</sup> and Wenxia Yuan<sup>\*, a</sup>

*<sup>a</sup> Department of Chemistry, School of Chemistry and Biological Engineering,  
University of Science and Technology Beijing, Beijing 100083, China*

*<sup>b</sup> The Beijing Municipal Key Laboratory of New Energy Materials and Technologies,  
School of Materials Sciences and Engineering, University of Science and Technology  
Beijing, Beijing 100083, China*

*<sup>c</sup> Beijing Advanced Innovation Center for Materials Genome Engineering, Institute of  
Solid State Chemistry, University of Science and Technology Beijing, Beijing 100083,  
China*

Corresponding Authors:

Z. Guo, E-mail: guozhongn@ustb.edu.cn; W. Yuan, E-mail: wx yuanwz@163.com

## CONTENTS

|                                                                                                                                                                                                                                                                                        |      |
|----------------------------------------------------------------------------------------------------------------------------------------------------------------------------------------------------------------------------------------------------------------------------------------|------|
| <b>Experimental Section</b>                                                                                                                                                                                                                                                            | S-3  |
| <b>Table S1.</b> Crystal data and structure refinement for $(\text{BA})_{10}\text{AgBi}_2\text{Br}_{19}$ at 293 K .                                                                                                                                                                    | S-5  |
| <b>Table S2.</b> Atomic coordinates ( $10^4$ ) and equivalent isotropic displacement parameters ( $\text{\AA}^2 \times 10^3$ ) for $(\text{C}_4\text{H}_{12}\text{N})_{10}\text{AgBi}_2\text{Br}_{19}$ at 293 K with estimated standard deviations in parentheses.                     | S-6  |
| <b>Table S3.</b> Anisotropic displacement parameters ( $\text{\AA}^2 \times 10^3$ ) for $(\text{C}_8\text{H}_{20}\text{N}_2)_2\text{AgInBr}_8$ at 293 K with estimated standard deviations in parentheses.                                                                             | S-7  |
| <b>Figure S1.</b> (a) SEM images of $(\text{BA})_4\text{AgBiBr}_8$ and $(\text{BA})_{10}\text{AgBi}_2\text{Br}_{19}$ with the molar ratio of Ag, Bi and Br from EDS. (b) EDS spectrum and (c) elemental mapping for $(\text{BA})_{10}\text{AgBi}_2\text{Br}_{19}$ .                    | S-9  |
| <b>Figure S2.</b> Experimental and calculated PXRD patterns of $(\text{BA})_4\text{AgBiBr}_8$ .                                                                                                                                                                                        | S-10 |
| <b>Figure S3.</b> Thermogravimetric analysis (TGA)-Differential scanning calorimetry (DSC) data for $(\text{BA})_{10}\text{AgBi}_2\text{Br}_{19}$ , and analogous 1D crystals in Ag-In and Ag-Sb systems.                                                                              | S-10 |
| <b>Figure S4.</b> The inorganic frameworks in $(\text{L-H}_2\text{Orn})_4[\text{Pb}_3\text{Br}_{14}]\cdot 2\text{H}_2\text{O}$ as 1D $\text{Pb}_3\text{Br}_{14}$ ribbons compared with the 1D $\text{AgBi}_2\text{Br}_{14}$ ribbons in $(\text{BA})_{10}\text{AgBi}_2\text{Br}_{19}$ . | S-11 |
| <b>Figure S5.</b> Optical photograph of the 1D crystals in Ag-Sb and Ag-In systems.                                                                                                                                                                                                    | S-11 |
| <b>Figure S6.</b> The molar ratio of Ag, Sb(In) and Br in the 1D crystals in Ag-Sb and Ag-In systems based on EDS measurements.                                                                                                                                                        | S-12 |
| <b>Figure S7.</b> PXRD patterns of the 1D crystals in Ag-Sb and Ag-In systems, compared to the pattern of $(\text{BA})_{10}\text{AgBi}_2\text{Br}_{19}$ .                                                                                                                              | S-12 |
| <b>Figure S8.</b> UV-vis diffuse-reflectance spectrum for 1D crystals in Ag-Sb and Ag-In systems, compared to the spectrum of $(\text{BA})_{10}\text{AgBi}_2\text{Br}_{19}$ (the same one with that used in main text).                                                                | S-13 |

## Experimental Section

### Materials and Synthesis

AgBr (99.9%, Aladdin), InBr<sub>3</sub> (99.9%, Aladdin), SbBr<sub>3</sub> (99.9%, Aladdin), BiBr<sub>3</sub> (99.9%, Aladdin), C<sub>4</sub>H<sub>11</sub>N (butylamine, 99.9%, Aladdin), and HBr (48% in water by weight, Aladdin) were used for synthesis. All chemicals were used as received without further purification.

(BA)<sub>4</sub>AgBi<sub>2</sub>Br<sub>19</sub> were prepared by combining BiBr<sub>3</sub> (0.2 mmol), AgBr (0.2 mmol) and C<sub>4</sub>H<sub>11</sub>N (0.5 mmol) in 0.5 mL HBr. A clear solution was obtained after heating and stirring at 100 °C for 8-10 min. The crystals were obtained by slowly cooling the solution to room temperature with a rate of 2 °C per hour. The final products were then obtained by filtering and drying in a vacuum oven. For the known (BA)<sub>2</sub>AgBiBr<sub>8</sub>, the synthetic route is basically the same with that of (BA)<sub>4</sub>AgBi<sub>2</sub>Br<sub>19</sub>, only with the increased amount of C<sub>4</sub>H<sub>11</sub>N, 0.8 mmol. By replacing the BiBr<sub>3</sub> with InBr<sub>3</sub> and SbBr<sub>3</sub>, the rod-like crystals were also obtained in Ag-In and Ag-Sb systems.

### Characterization

Single crystal X-ray diffractions were conducted on Bruker D8 Venture diffractometer using Mo K $\alpha$  radiation with  $\lambda = 0.7103 \text{ \AA}$  operating at 50 kV and 1.4 mA. The structure was solved and refined using the OLEX2 package.<sup>1</sup> Powder X-ray diffraction (PXRD) patterns were collected at room temperature on a PANalytical Empyrean diffractometer equipped with Cu K $\alpha$  radiation ( $\lambda = 1.541 \text{ \AA}$ ) operating at 45 kV and 40 mA. The morphology of the samples was observed via scanning electron microscopy (SEM, Regulus8100). The component analysis of elements was measured by energy dispersive X-ray spectroscopy (EDS, Esprit Compact). Optical absorption spectra were obtained using an UV-vis-NIR spectrophotometer (SHIMADZU UV-3600) with BaSO<sub>4</sub> serving as a standard. Photoluminescence emission and excitation spectrum were obtained using a PLSP920 fluorescence spectrophotometer equipped with a PMT detector at room temperature and a 150 W Xe900 lamp as the excitation source. Thermogravimetric analysis (TGA) and

differential scanning calorimetry (DSC) were conducted on a Setaram Labsys Evo instrument at a heating rate of  $\pm 10$  °C/min with a maximum temperature of 600 °C. Approximately 20 mg of each sample was used for the measurement.

### Calculation

The theoretical calculations were performed in the density functional theory (DFT) using the Vienna Ab initio Simulation Package (VASP) and the Projector-augmented wave (PAW) scheme.<sup>2-6</sup> The Perdew-Burke-Ernzerhof generalized gradient approximation (PBE-GGA) was used for the exchange correlation functional.<sup>7</sup> The wave functions were expanded into plane waves up to a cutoff energy of 600 eV.  $1s^1$ ,  $2s^22p^2$ ,  $2s^22p^3$ ,  $5s^14d^{10}$ ,  $6s^26p^3$ ,  $4s^24p^5$  were used as valence electrons for H, C, N, Ag, Bi and Br, respectively.  $\Gamma$ -centered  $k$ -points grids of  $4 \times 4 \times 3$  were sampled to calculate the electronic properties of  $(\text{BA})_4\text{AgBi}_2\text{Br}_{19}$ .

**Table S1.** Crystal data and structure refinement for (C<sub>4</sub>H<sub>12</sub>N)<sub>10</sub>AgBi<sub>2</sub>Br<sub>19</sub> at 293 K.

|                                                     |                                                                                                                                   |
|-----------------------------------------------------|-----------------------------------------------------------------------------------------------------------------------------------|
| Empirical formula                                   | (C <sub>4</sub> H <sub>12</sub> N) <sub>10</sub> AgBi <sub>2</sub> Br <sub>19</sub>                                               |
| Formula weight                                      | 2789.57                                                                                                                           |
| Temperature                                         | 293(2) K                                                                                                                          |
| Wavelength                                          | 0.71073 Å                                                                                                                         |
| Crystal system                                      | monoclinic                                                                                                                        |
| Space group                                         | <i>C2/c</i>                                                                                                                       |
| Unit cell dimensions                                | $a = 32.453(2)$ Å, $\alpha = 90^\circ$<br>$b = 8.0862(6)$ Å, $\beta = 106.856(3)^\circ$<br>$c = 36.082(3)$ Å, $\gamma = 90^\circ$ |
| Volume                                              | 9061.9(12) Å <sup>3</sup>                                                                                                         |
| <i>Z</i>                                            | 4                                                                                                                                 |
| Density (calculated)                                | 2.045 g/cm <sup>3</sup>                                                                                                           |
| Absorption coefficient                              | 12.496 mm <sup>-1</sup>                                                                                                           |
| <i>F</i> (000)                                      | 5240                                                                                                                              |
| Crystal size                                        | 0.24 × 0.1 × 0.05 mm <sup>3</sup>                                                                                                 |
| $\theta$ range for data collection                  | 2.359 to 24.998°                                                                                                                  |
| Index ranges                                        | -38 ≤ <i>h</i> ≤ 38, -9 ≤ <i>k</i> ≤ 9, -42 ≤ <i>l</i> ≤ 42                                                                       |
| Reflections collected                               | 48211                                                                                                                             |
| Independent reflections                             | 7933 [ <i>R</i> <sub>int</sub> = 0.0974]                                                                                          |
| Completeness to $\theta = 24.998^\circ$             | 99.4%                                                                                                                             |
| Refinement method                                   | Full-matrix least-squares on <i>F</i> <sup>2</sup>                                                                                |
| Data / restraints / parameters                      | 7933 / 69 / 257                                                                                                                   |
| Goodness-of-fit                                     | 1.064                                                                                                                             |
| Final <i>R</i> indices [ <i>I</i> > 2σ( <i>I</i> )] | <i>R</i> <sub>obs</sub> = 0.0812, <i>wR</i> <sub>obs</sub> = 0.1990                                                               |
| <i>R</i> indices [all data]                         | <i>R</i> <sub>all</sub> = 0.1179, <i>wR</i> <sub>all</sub> = 0.2234                                                               |
| Largest diff. peak and hole                         | 2.046 and -1.497 e·Å <sup>-3</sup>                                                                                                |

$R = \Sigma||F_0| - |F_c||/\Sigma|F_0|$ ,  $wR = \{\Sigma[w(|F_0|^2 - |F_c|^2)^2]/\Sigma[w(|F_0|^4)]\}^{1/2}$  and  $w = 1/[\sigma^2(F_0^2) + (0.1001P)^2 + 167.2719P]$ , where  $P = (F_0^2 + 2F_c^2)/3$ .

**Table S2.** Atomic coordinates ( $10^4$ ) and equivalent isotropic displacement parameters ( $\text{\AA}^2 \times 10^3$ ) for  $(\text{C}_4\text{H}_{12}\text{N})_{10}\text{AgBi}_2\text{Br}_{19}$  at 293 K with estimated standard deviations in parentheses.

| Label  | x        | y         | z        | Occupancy | $U_{\text{eq}}^*$ |
|--------|----------|-----------|----------|-----------|-------------------|
| Bi(1)  | 2843(1)  | 7570(1)   | 1213(1)  | 1         | 53(1)             |
| Ag(1)  | 2500     | 2500      | 0        | 1         | 68(1)             |
| Br(1)  | 3736(1)  | 7000(2)   | 1337(1)  | 1         | 90(1)             |
| Br(2)  | 2843(1)  | 5105(2)   | 1772(1)  | 1         | 82(1)             |
| Br(3)  | 3032(1)  | 10168(2)  | 1768(1)  | 1         | 80(1)             |
| Br(4)  | 2819(1)  | 9876(2)   | 611(1)   | 1         | 83(1)             |
| Br(5)  | 1946(1)  | 8155(2)   | 1090(1)  | 1         | 78(1)             |
| Br(6)  | 2626(1)  | 5112(2)   | 623(1)   | 1         | 80(1)             |
| Br(7)  | 1704(1)  | 2072(2)   | 4(1)     | 1         | 91(1)             |
| Br(8)  | 4171(2)  | 2952(6)   | 2245(2)  | 1         | 214(2)            |
| Br(9)  | 5000     | 2931(5)   | 2500     | 1         | 150(2)            |
| Br(1A) | 1894(1)  | 2270(2)   | 2126(1)  | 1         | 83(1)             |
| N(4)   | 2077(11) | 2450(30)  | 1141(10) | 1         | 200(8)            |
| C(13)  | 573(11)  | 2350(30)  | 804(12)  | 1         | 200(8)            |
| C(14)  | 936(11)  | 3570(30)  | 830(11)  | 1         | 200(8)            |
| C(15)  | 1285(12) | 2250(40)  | 961(13)  | 1         | 200(8)            |
| C(16)  | 1699(14) | 3350(40)  | 1035(12) | 1         | 200(8)            |
| N(3)   | 2219(7)  | 8290(30)  | 2168(6)  | 1         | 139(4)            |
| C(9)   | 826(8)   | 7630(30)  | 1534(8)  | 1         | 139(4)            |
| C(10)  | 1251(8)  | 8350(30)  | 1828(7)  | 1         | 139(4)            |
| C(11)  | 1445(9)  | 6710(30)  | 1925(7)  | 1         | 139(4)            |
| C(12)  | 1906(10) | 7180(30)  | 2244(8)  | 1         | 139(4)            |
| N(2)   | 3506(8)  | 12770(20) | 1176(9)  | 1         | 155(11)           |
| C(5)   | 4714(16) | 12810(70) | 722(18)  | 1         | 310(30)           |
| C(6)   | 4520(20) | 11640(70) | 960(20)  | 1         | 320(30)           |
| C(7)   | 4179(17) | 12710(60) | 982(13)  | 1         | 230(20)           |

|       |          |           |          |   |         |
|-------|----------|-----------|----------|---|---------|
| C(8)  | 3879(16) | 11900(40) | 1185(12) | 1 | 194(17) |
| N(1)  | 1840(9)  | 7980(30)  | 27(8)    | 1 | 179(6)  |
| C(1)  | 453(12)  | 7700(30)  | 133(11)  | 1 | 179(6)  |
| C(2)  | 685(10)  | 7330(40)  | -188(10) | 1 | 179(6)  |
| C(3)  | 1128(10) | 7520(40)  | 113(10)  | 1 | 179(6)  |
| C(4)  | 1412(11) | 7170(40)  | -136(11) | 1 | 179(6)  |
| N(5)  | 3779(6)  | 7180(30)  | 2323(6)  | 1 | 140(8)  |
| C(17) | 5021(10) | 7390(60)  | 3434(14) | 1 | 290(20) |
| C(18) | 4809(10) | 7820(60)  | 3061(13) | 1 | 249(15) |
| C(19) | 4388(9)  | 7470(50)  | 2878(11) | 1 | 213(13) |
| C(20) | 4180(12) | 7890(50)  | 2509(11) | 1 | 205(13) |

\* $U_{eq}$  is defined as one third of the trace of the orthogonalized  $U_{ij}$  tensor.

**Table S3.** Anisotropic displacement parameters ( $\text{\AA}^2 \times 10^3$ )  $(C_4H_{12}N)_{10}AgBi_2Br_{19}$  at 293 K with estimated standard deviations in parentheses.

| Label  | $U_{11}$ | $U_{22}$ | $U_{33}$ | $U_{12}$ | $U_{13}$ | $U_{23}$ |
|--------|----------|----------|----------|----------|----------|----------|
| Bi(1)  | 81(1)    | 36(1)    | 44(1)    | 0(1)     | 19(1)    | -1(1)    |
| Ag(1)  | 93(2)    | 56(1)    | 56(1)    | -7(1)    | 24(1)    | -4(1)    |
| Br(1)  | 88(2)    | 81(2)    | 105(2)   | 3(1)     | 35(2)    | 3(1)     |
| Br(2)  | 121(2)   | 59(1)    | 62(1)    | -16(1)   | 19(1)    | 17(1)    |
| Br(3)  | 113(2)   | 56(1)    | 71(1)    | -9(1)    | 24(1)    | -22(1)   |
| Br(4)  | 116(2)   | 66(1)    | 64(1)    | -8(1)    | 20(1)    | 24(1)    |
| Br(5)  | 81(2)    | 71(1)    | 82(2)    | 1(1)     | 26(1)    | -2(1)    |
| Br(6)  | 122(2)   | 58(1)    | 61(1)    | -9(1)    | 30(1)    | -22(1)   |
| Br(7)  | 91(2)    | 74(2)    | 115(2)   | -1(1)    | 39(2)    | 4(1)     |
| Br(8)  | 229(5)   | 243(4)   | 166(3)   | 7(4)     | 52(3)    | -24(3)   |
| Br(9)  | 223(5)   | 133(3)   | 104(3)   | 0        | 61(3)    | 0        |
| Br(1A) | 98(2)    | 68(1)    | 78(2)    | 1(1)     | 20(1)    | 4(1)     |
| N(4)   | 260(20)  | 121(12)  | 239(19)  | -17(10)  | 105(19)  | 5(11)    |
| C(13)  | 260(20)  | 121(12)  | 239(19)  | -17(10)  | 105(19)  | 5(11)    |

|       |         |          |          |         |         |         |
|-------|---------|----------|----------|---------|---------|---------|
| C(14) | 260(20) | 121(12)  | 239(19)  | -17(10) | 105(19) | 5(11)   |
| C(15) | 260(20) | 121(12)  | 239(19)  | -17(10) | 105(19) | 5(11)   |
| C(16) | 260(20) | 121(12)  | 239(19)  | -17(10) | 105(19) | 5(11)   |
| N(3)  | 146(12) | 125(9)   | 140(10)  | 11(7)   | 34(8)   | 6(7)    |
| C(9)  | 146(12) | 125(9)   | 140(10)  | 11(7)   | 34(8)   | 6(7)    |
| C(10) | 146(12) | 125(9)   | 140(10)  | 11(7)   | 34(8)   | 6(7)    |
| C(11) | 146(12) | 125(9)   | 140(10)  | 11(7)   | 34(8)   | 6(7)    |
| C(12) | 146(12) | 125(9)   | 140(10)  | 11(7)   | 34(8)   | 6(7)    |
| N(2)  | 130(20) | 55(10)   | 270(30)  | 1(11)   | 50(20)  | 1(13)   |
| C(5)  | 160(40) | 420(100) | 350(80)  | -50(50) | 60(50)  | 70(60)  |
| C(6)  | 210(60) | 290(70)  | 430(100) | 30(60)  | 80(60)  | 40(70)  |
| C(7)  | 230(50) | 290(60)  | 170(40)  | 120(50) | 60(40)  | 10(30)  |
| C(8)  | 220(50) | 130(30)  | 180(30)  | -30(30) | -20(30) | -20(30) |
| N(1)  | 173(15) | 183(13)  | 181(15)  | -24(11) | 52(11)  | -33(10) |
| C(1)  | 173(15) | 183(13)  | 181(15)  | -24(11) | 52(11)  | -33(10) |
| C(2)  | 173(15) | 183(13)  | 181(15)  | -24(11) | 52(11)  | -33(10) |
| C(3)  | 173(15) | 183(13)  | 181(15)  | -24(11) | 52(11)  | -33(10) |
| C(4)  | 173(15) | 183(13)  | 181(15)  | -24(11) | 52(11)  | -33(10) |
| N(5)  | 84(12)  | 240(20)  | 92(12)   | 14(14)  | 16(9)   | 3(13)   |
| C(17) | 52(17)  | 470(60)  | 300(40)  | 10(30)  | -38(19) | -20(40) |
| C(18) | 60(14)  | 390(40)  | 270(30)  | -20(20) | 11(15)  | -40(30) |
| C(19) | 70(14)  | 350(30)  | 190(20)  | -30(20) | -6(13)  | -30(20) |
| C(20) | 121(19) | 310(30)  | 170(20)  | -50(20) | 29(14)  | -30(20) |

---

The anisotropic displacement factor exponent takes the form:  $-2\pi^2[h^2a^{*2}U_{11} + \dots + 2hka^*b^*U_{12}]$ .



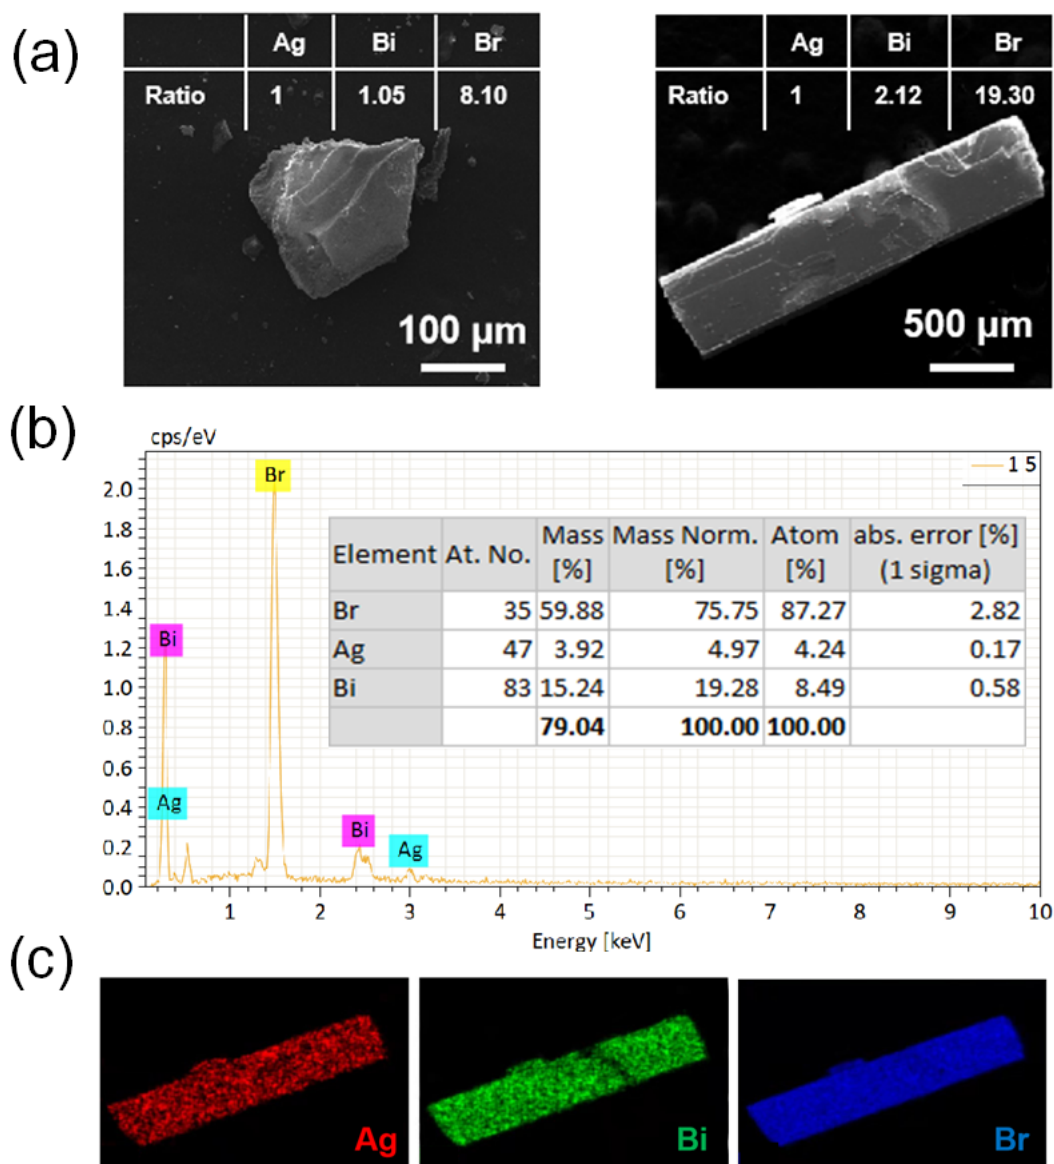

**Figure S1.** (a) SEM images of  $(\text{BA})_4\text{AgBiBr}_8$  and  $(\text{BA})_{10}\text{AgBi}_2\text{Br}_{19}$  with the normalized molar ratio of Ag, Bi and Br from EDS. (b) EDS spectrum and (c) elemental mapping for  $(\text{BA})_{10}\text{AgBi}_2\text{Br}_{19}$ .

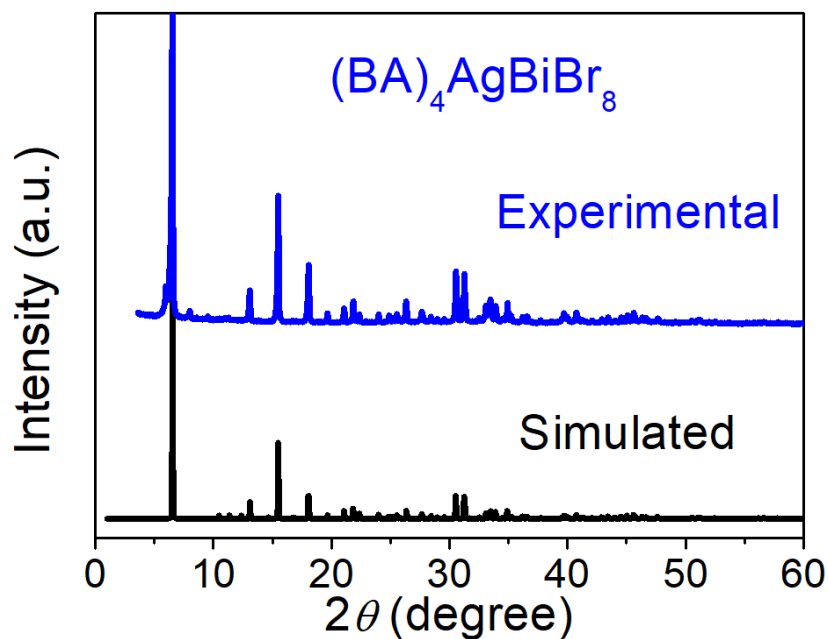

**Figure S2.** Experimental and calculated PXRD patterns of  $(\text{BA})_4\text{AgBiBr}_8$ .

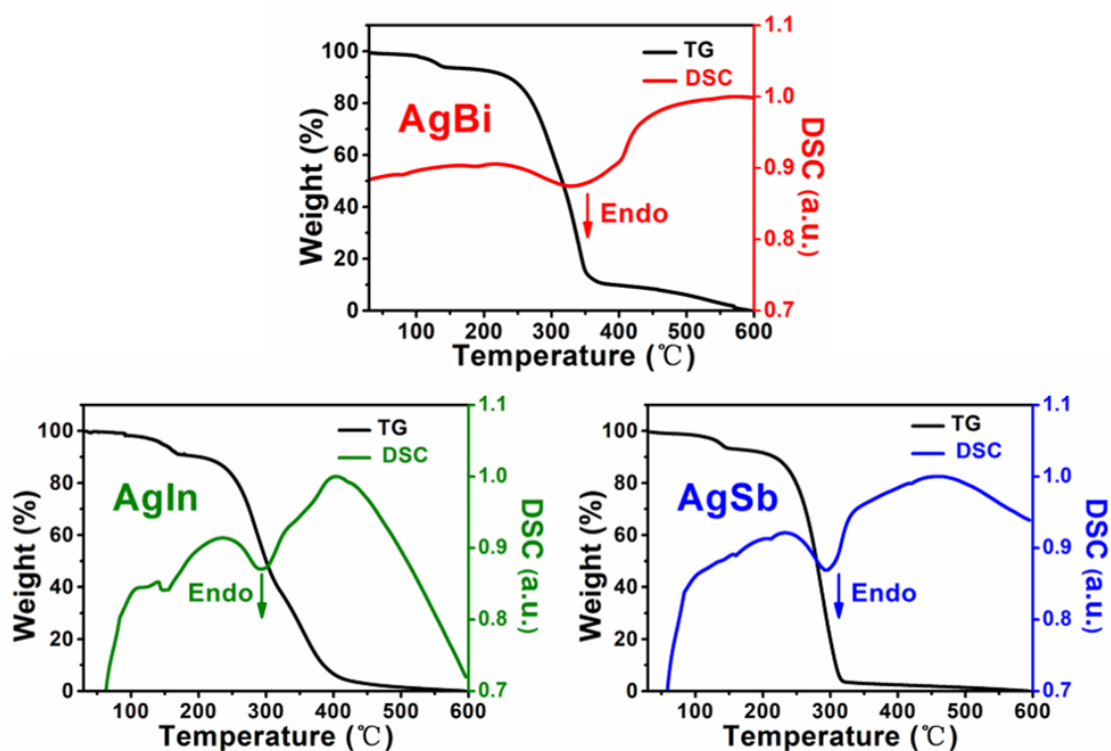

**Figure S3.** Thermogravimetric analysis (TGA)-Differential scanning calorimetry (DSC) data for  $(\text{BA})_{10}\text{AgBi}_2\text{Br}_{19}$ , and analogous 1D crystals in Ag-In and Ag-Sb systems.

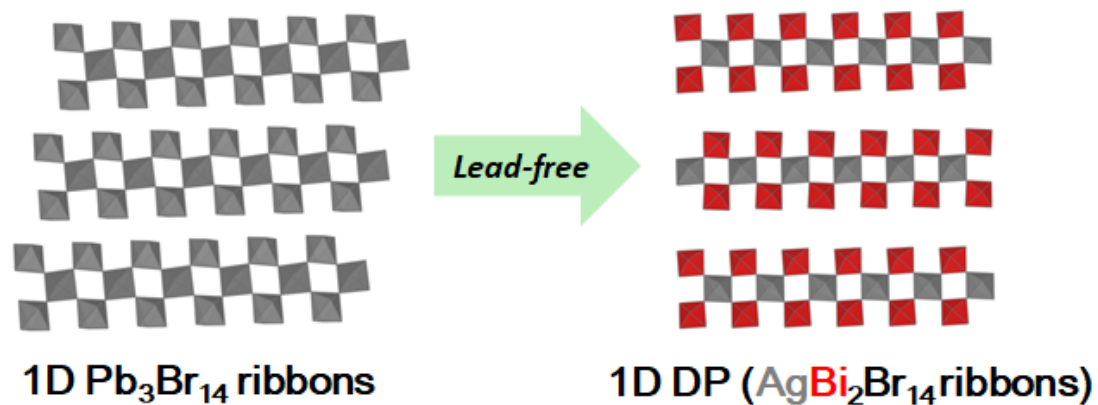

**Figure S4.** The inorganic frameworks in  $(\text{L-H}_2\text{Orn})_4[\text{Pb}_3\text{Br}_{14}]\cdot 2\text{H}_2\text{O}$  as 1D  $\text{Pb}_3\text{Br}_{14}$  ribbons compared with the 1D  $\text{AgBi}_2\text{Br}_{14}$  ribbons in  $(\text{BA})_{10}\text{AgBi}_2\text{Br}_{19}$ .

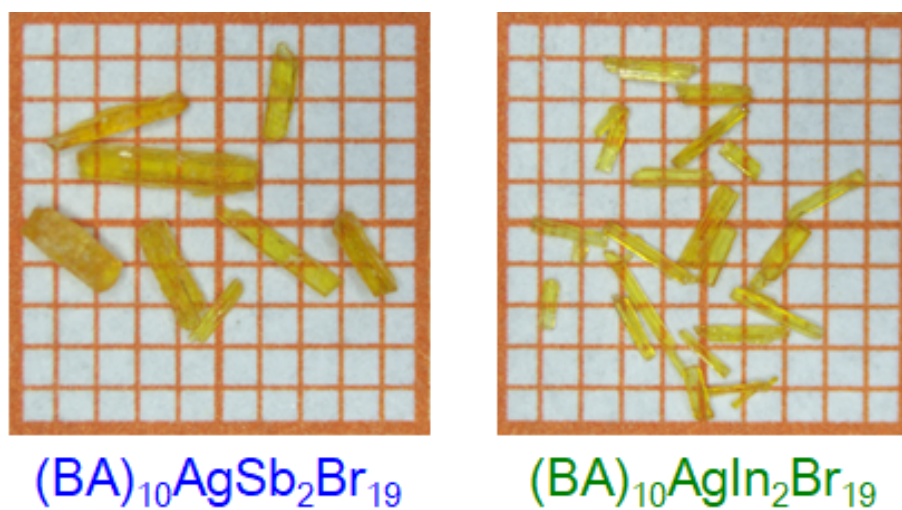

**Figure S5.** Optical photograph of the 1D crystals in Ag-Sb and Ag-In systems.

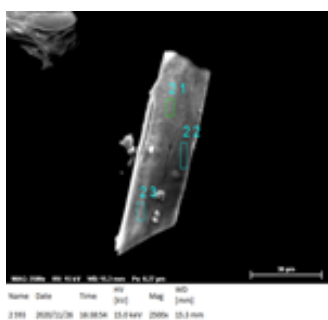

| Element | At. No. | Mass [%]     | Mass Norm. [%] | Atom [%]      | abs. error [%] (1 sigma) |
|---------|---------|--------------|----------------|---------------|--------------------------|
| Br      | 35      | 70.53        | 80.19          | 85.56         | 3.31                     |
| Ag      | 47      | 5.57         | 6.33           | 5.00          | 0.22                     |
| Sb      | 51      | 11.86        | 13.48          | 9.44          | 0.40                     |
|         |         | <b>87.95</b> | <b>100.00</b>  | <b>100.00</b> |                          |

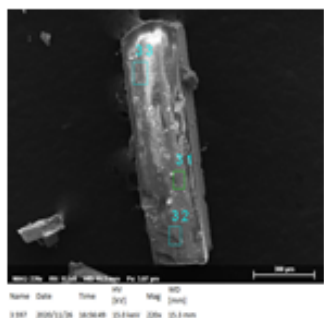

| Element | At. No. | Mass [%]     | Mass Norm. [%] | Atom [%]      | abs. error [%] (1 sigma) |
|---------|---------|--------------|----------------|---------------|--------------------------|
| Br      | 35      | 74.65        | 83.47          | 87.66         | 3.52                     |
| Ag      | 47      | 4.85         | 5.42           | 4.22          | 0.21                     |
| In      | 49      | 9.94         | 11.11          | 8.12          | 0.36                     |
|         |         | <b>89.44</b> | <b>100.00</b>  | <b>100.00</b> |                          |

**Figure S6.** The molar ratio of Ag, Sb(In) and Br in the 1D crystals in Ag-Sb and Ag-In systems based on EDS measurements.

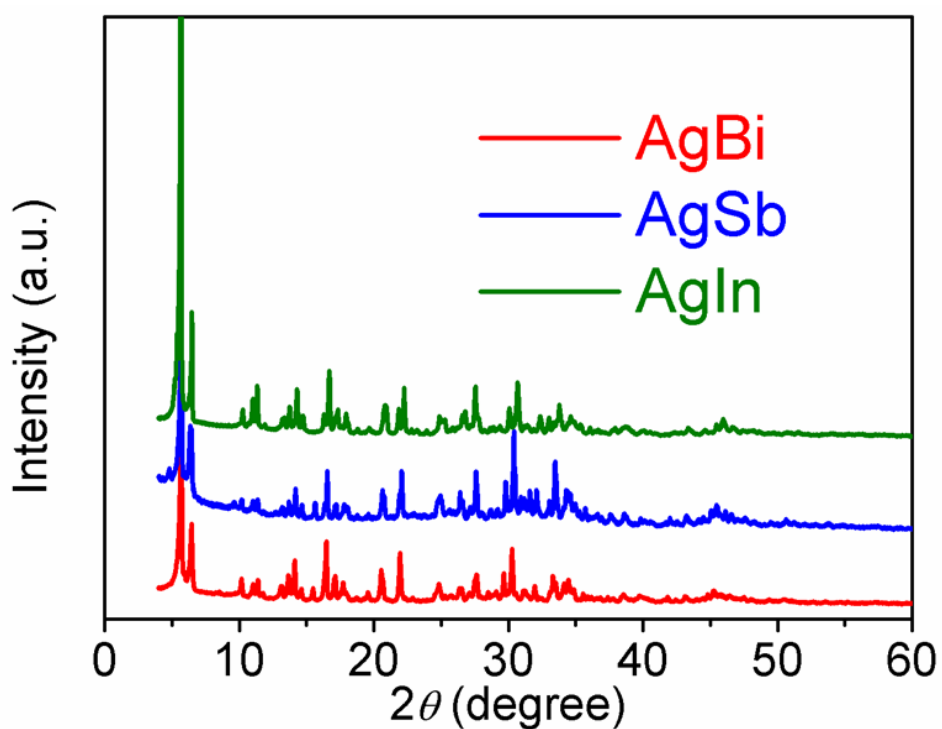

**Figure S7.** PXRD patterns of the 1D crystals in Ag-Sb and Ag-In systems, compared to the pattern of  $(\text{BA})_{10}\text{AgBi}_2\text{Br}_{19}$ .

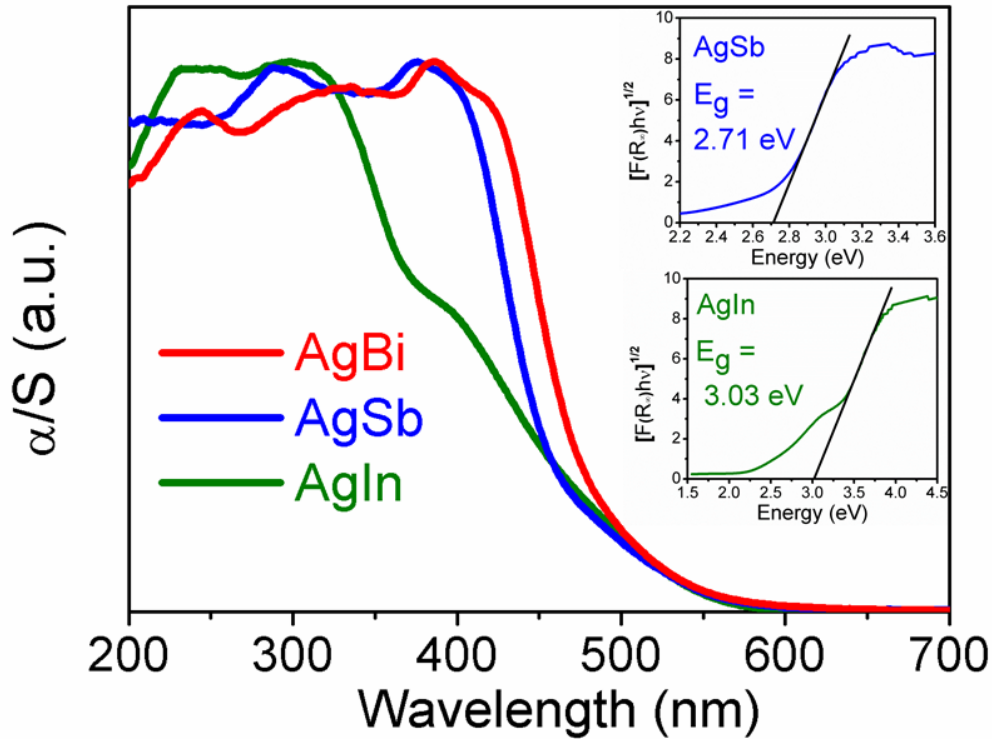

**Figure S8.** UV-vis diffuse-reflectance spectrum for 1D crystals in Ag-Sb and Ag-In systems, compared to the spectrum of  $(\text{BA})_{10}\text{AgBi}_2\text{Br}_{19}$  (the same one with that used in main text).

#### References:

- [1] O. V. Dolomanov, L. J. Bourhis, R. J. Gildea, J. A. Howard and H. Puschmann, *J. Appl. Crystallogr.*, 2009, **42**, 339-341.
- [2] P. Hohenberg and W. Kohn, *Phys. Rev.*, 1964, **136**, B864.
- [3] W. Kohn and L. J. Sham, *Phys. Rev.*, 1965, **140**, A1133.
- [4] G. Kresse and J. Furthmüller, *Phys. Rev. B.*, 1996, **54**, 11169.
- [5] G. Kresse and D. Joubert, *Phys. Rev. B.*, 1999, **59**, 1758-1775.
- [6] P. E. Blöchl, *Phys. Rev. B.*, 1994, **50**, 17953.
- [7] J. P. Perdew, K. Burke, M. Ernzerhof, *Phys. Rev. Lett.*, 1996, **77**, 3865-3868.
